# Supplementary material for: Comparative Studies on the Anti-Inflammatory and Apoptotic Activities of Four Greek Essential Oils: Involvement in the Regulation of NF-κΒ and Steroid Receptor Signaling
Source: MDPI journal article supplement (doi:10.3390/life13071534), 2023-07-10

# Chios Mastic Oil – Chios Mastiha Oil.

## Technical Specifications

**Number: SP551**  
Edition: 8  
Date of issue: 12/10/2018

### 1. Product Identification

**Product Code:** TMX-0001  
**Product Name:** Chios Mastic Oil (Chios Mastiha Oil)  
**Natural product:** Yes

### 2. Product Description

Chios Mastic Oil comes out through distillation process with water, it is **100% natural**, does not contain any harmful substance or any additives, which could have damaging effects for the consumer.

**Natural occurrence:** From Chios Mastic Gum (Chios Mastiha) the air-dried resinous exudation from *Pistacia. Lentiscus* L. var. Chia (Family Anacardiaceae), a shrub of small evergreen tree. The tree is native to the Mediterranean region and principally cultivated on the Greek island of Chios.

**CAS Name:** Lentisque absolute  
**CAS Number:** 61789-92-2  
**EINECS:** 263-098-6  
**INCI NAME:** MonoID: 24054 Pistacia Lentiscus (Mastic) Gum Oil

### 3. Food Legislation Information

The Council of Europe (1981) included mastic in the list of plants and parts thereof, which are acceptable for use in foods (annex I, EC 2081/1992 article 1, part1).

Chios Mastic Oil is manufactured according to the legislation at present in force, in this country and the specifications of this company, being fit for human consumption at the

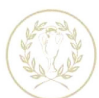

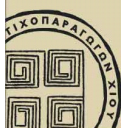

dose recommended for its use. The usage of this product in certain applications depends on local interpretations concerning foodstuffs.

#### 4. Product Characteristics

##### Organoleptic Properties:

|                |                                   |
|----------------|-----------------------------------|
| Physical form: | Resinous liquid.                  |
| Colour:        | Colourless to faintly yellow.     |
| Odour:         | Balsamic, green and rustic odour. |

##### Physical Properties:

|                       |                               |
|-----------------------|-------------------------------|
| Density { $d_{20}$ }: | 0,8300 - 0,8700 gr/ml (20 °C) |
| Flash point:          | +105 °C                       |

*(Parameters not routinely checked)*

|                                              |                                                          |
|----------------------------------------------|----------------------------------------------------------|
| Reactive Index { $n_D^{20}$ }:               | 1,4640 - 1,4680                                          |
| Optical Rotation [ $\alpha$ ] <sub>D</sub> : | +35° - +40°                                              |
| Chromatic Parameters:                        | L: 90.00 - 105.00<br>a: -15.00 - 5.00<br>b: 0.00 - 25.00 |
| Total Acidity (as oleic acid):               | 0,06 – 0,09 %                                            |
| Saponification Value:                        | *                                                        |
| Freezing Point:                              | below 0 °C                                               |

##### Typical Chemical Composition\*:

Evaluated by gas chromatography – with flame ionization detector (GC-FID) technique

| Compound                                | Composition (%) |
|-----------------------------------------|-----------------|
| <i><math>\alpha</math>-pinene</i>       | 79-88           |
| <i><math>\beta</math>-myrcene</i>       | 7-14            |
| <i><math>\beta</math>-pinene</i>        | 2,0-3,0         |
| <i>Limonene</i>                         | 0,40-0,95       |
| <i><math>\beta</math>-caryophyllene</i> | 0,15-0,65       |
| <i>Camphene</i>                         | 0,30-0,8        |

\* Compounds with concentration above 0,5% referred only. The aforementioned concentration limits is based on data available to us, however they should not be account as strictly quality specifications, since Mastic Oil is natural product, very sensible in quality and weather condition variations, which may affect significantly the concentration of its main ingredients.

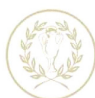



### **Microbiological Properties:**

Chios Mastic Oil does not contain any pathogenic organism or their metabolic products in amounts, which is harmful to the health of the final consumer. Additionally, this product presents antimicrobial and antifungal activity independently confirmed and published in scientific papers.

| Parameter                                     | Method of Analysis | Result |
|-----------------------------------------------|--------------------|--------|
| <i>Aerobic Microbial Count at 30°C, cfu/g</i> | APHA 6.54          | <1000  |
| <i>Total coliforms, cfu/g</i>                 | APHA 6.54          | < 100  |
| <i>Escherichia Coli, cfu/g</i>                | APHA 6.54          | <10    |
| <i>Yeast-Molds, cfu/g</i>                     | APHA 6.54          | <10    |

### **Heavy Metals:**

| Parameter             | Method of Analysis | Result      |
|-----------------------|--------------------|-------------|
| <i>Cadmium, mg/kg</i> | ICP-OES            | <0.01 mg/Kg |
| <i>Lead, mg/kg</i>    | ICP-OES            | <0.05 mg/Kg |
| <i>Mercury, mg/kg</i> | MTD Me.31          | <0.02 mg/Kg |
| <i>Arsenic, mg/kg</i> | MTD Me.41          | <0.05 mg/Kg |

## **5. Danger identification**

No specific hazard known.

## **6. Shelf Life**

Stable for 24 month if stored tightly closed in the original containers, in a dry & cool place (< 7°C), away from light.

## **7. Safety & Handling Instructions**

Handle in well ventilated areas, avoid eyes or skin contact. Keep it away from source of heat, sparks and naked flame. It is advised to use glasses and gloves, not to breathe the emitted vapours. Close container tightly after using.



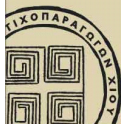

---

### **8. Packaging:**

Chios Mastic Oil is supplied in glass jars or aluminium internal lacquered containers.  
Net Weights: 5, 10, 50, 100, 500, 1000g

---

### **9. Additional Data:**

- Chios Mastic Oil exhibits a high level of fluidity.
- Chios Mastic oil presents antimicrobial and antifungal activity.
- The product does not contain (with reference to EC 1829/2003& 1830/2003) Genetically Modified Organisms and/or any products derived from such organisms.

This product corresponds with the regulations of the European food legislations. This specification is carefully drawn up and represents our current knowledge. However, we are not liable for any damage resulting from wilful acts or gross negligence.  
We guarantee therefore a proper quality within our general conditions of sales.

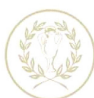

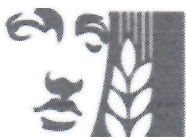

HELLENIC AGRICULTURAL ORGANIZATION - DEMETER

DIRECTORATE GENERAL OF AGRICULTURAL RESEARCH

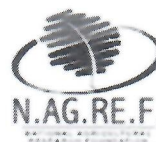

INSTITUTE OF PLANT BREEDING AND GENETIC RESOURCES  
DEPARTMENT OF AROMATIC AND MEDICINAL PLANTS  
P.O.Box 60458, GR 57001, THERMI, THESSALONIKI, GREECE  
TEL.: +30 2310 471 110, ext. 0 202  
FAX: +30 2310 473 024  
Email: [chatzopoulou@ipgrb.gr](mailto:chatzopoulou@ipgrb.gr)  
[aromparc.ethiage@gmail.com](mailto:aromparc.ethiage@gmail.com)

Thessaloniki, 24 July 2019  
Prot.no: 2944

To THARROS SA – TZIOUMAKIS Bros  
5th km Tirnavos-Larisa  
GR 40100, TIRNAVOS  
GREECE

### CERTIFICATE OF ANALYSIS

|               |   |                              |
|---------------|---|------------------------------|
| Sample number | : | 186/2019                     |
| Sample type   | : | LAVENDER ESSENTIAL OIL       |
| Costumer      | : | THARROS SA – TZIOUMAKIS Bros |
| Region        | : | TIRNAVOS – LARISA, GREECE    |

| ESSENTIAL OIL ANALYSIS   |         |                                    |         |
|--------------------------|---------|------------------------------------|---------|
| COMPOUND                 | % YIELD | COMPOUND                           | % YIELD |
| hexyl methyl ether       | 0,08    | hexyl propionate                   | 0,07    |
| $\alpha$ -thujene        | 0,15    | 1-octen-3 yl acetate               | 1,14    |
| $\alpha$ -pinene         | 0,31    | 3-octanyl acetate                  | 0,04    |
| camphene                 | 0,12    | allo-ocimene                       | 0,22    |
| 1-octen-3-ol             | 0,15    | camphor                            | 0,16    |
| 3-octanone               | 0,49    | hexyl isobutyrate                  | 0,10    |
| $\beta$ -myrcene         | 1,68    | lavandulol                         | 0,58    |
| 3-octanol+butyl butyrate | 0,14    | borneol                            | 0,42    |
| alpha -phellandrene      | 0,07    | terpinen-4-ol                      | 6,76    |
| $\delta$ -3-carene       | 0,10    | crypton                            | 0,08    |
| n-hexyl acetate          | 0,53    | $\alpha$ -terpineol+hexyl butyrate | 1,50    |
| $\alpha$ -terpinene      | 0,12    | linalyl acetate                    | 26,92   |
| p-cymene                 | 0,12    | bornyl acetate                     | 0,15    |
| limonene                 | 0,46    | lavandulyl acetate                 | 5,28    |
| $\beta$ -phellandrene    | 0,07    | neryl acetate                      | 0,57    |
| 1,8-cineol               | 0,61    | geranyl acetate                    | 1,27    |
| cis- $\beta$ -ocimene    | 9,72    | $\beta$ -caryophyllene             | 4,34    |
| trans- $\beta$ -ocimene  | 3,93    | $\alpha$ -santalene                | 0,33    |
| $\gamma$ -terpinene      | 0,29    | $\alpha$ -bergamotene              | 0,14    |
| cis-linalool oxide       | 0,16    | $\alpha$ -humulene                 | 0,12    |
| $\alpha$ -terpinolene    | 0,17    | trans- $\beta$ -farnesene          | 3,51    |
| trans-linalool oxide     | 0,05    | D-germacrene                       | 0,22    |
| linalool                 | 25,58   | $\gamma$ -cadinene                 | 0,08    |
| hotrienol                | 0,06    | caryophyllene oxide                | 0,10    |

The Deputy Director  
  
Dr P. Chatzopoulou  
Senior Researcher

The Chemist  
  
Eleni Lalidou



Customer :

**THARROS HERBS & OILS PC**

**For the attention of Nancy Ntagobudi  
1st KM Agias Sofias-provincial road Tirnavos-Larisa  
40100 TIRNAVOS, GREECE**

**Sample Nature :** ESSENTIAL OIL

**Botanical name :** MELISSA OFFICINALIS

**Common name :** MELISSE

**Batch number :** SAMPLE

**Origin :** -

**Plant part :** AERIAL PART

**Our reference :** Y147

**Receipt :** 01/07/2019

**Analysis date :** 09/09/2017

**Packaging :** Aluminium flask of 5mL

**Requested analysis :** Classic analysis

**Sample storage :** 1 year - room temperature

**Comments and conclusions :**

**BATCH IN COMPLIANCE WITH THE STANDARD  
OF MELISSA ESSENTIAL OIL**

**Report validated by :** Daniel Dantin - *Laboratory director*

Line Pauset - *Quality manager*



**GAS CHROMATOGRAPHY (according to the norm NF ISO 11024)**

**Analysis conditions :**

- . GC/MS Agilent 7890 / 5977 – Column : VF WAX (polaire) 60 m \* 0.25 mm \* 0.25 µm
- . GC/FID Agilent 6890 – Column : VF WAX (polaire) 60 m \* 0.25 mm \* 0.25 µm
- . Temperature program : 5 min to 60°C - 3°C/min until 250°C - 5 min to 250°C
- . Carrier gas : He (23 psis/MS – 30 psis/FID)
- . Sample injection / split : 1 µl of 10 % solution in hexane
- . Mass range : 30 to 350 - Oil compounds are identified by a combination of retention times and mass spectra library (our own database and NIST commercial database).
- . Percentages are calculated from GC/FID peaks areas without using corrections factors.

**Chromatographic profile :**

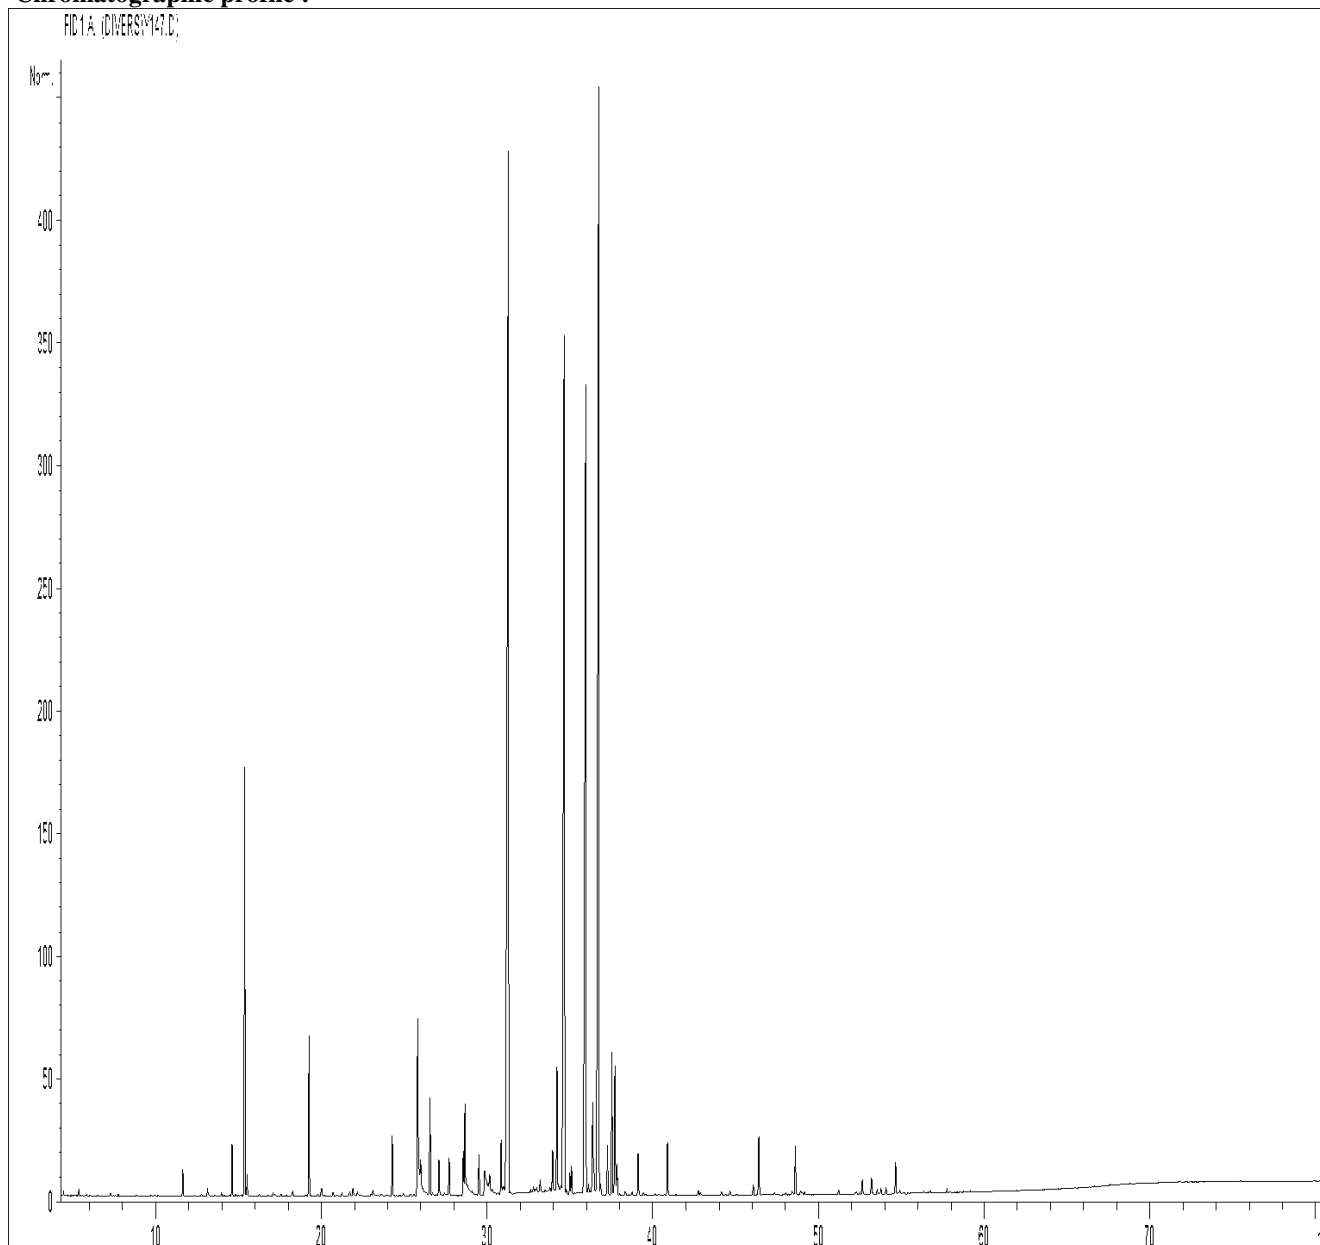

**Identification results : MELISSA OIL**

| Pics | RT (min) | Compound name                               | %           | Norm (%) | Allergens (%) |
|------|----------|---------------------------------------------|-------------|----------|---------------|
| 1    | 4.44     | ACETONE                                     | 0.04        |          |               |
| 2    | 5.34     | BUTANAL 2-METHYL                            | 0.02        |          |               |
| 3    | 5.38     | ISOVALERALDEHYDE                            | 0.03        |          |               |
| 4    | 5.85     | FURAN 2-ETHYL                               | 0.02        |          |               |
| 5    | 7.29     | alpha-PINENE                                | 0.02        |          |               |
| 6    | 7.75     | FURAN.2.5-DIETHYLTETRAHYDRO-                | 0.02        |          |               |
| 7    | 10.15    | SABINENE                                    | 0.02        |          |               |
| 8    | 11.65    | beta-MYRCENE                                | 0.22        |          |               |
| 9    | 12.77    | 2,3-DEHYDRO-1,8-CINEOL                      | 0.02        |          |               |
| 10   | 13.14    | LIMONENE                                    | 0.07        |          | 0.07          |
| 11   | 13.18    | 1-BUTANOL, 3-METHYL-                        | 0.02        |          |               |
| 12   | 13.98    | 2-HEXENAL                                   | 0.03        |          |               |
| 13   | 14.61    | Cis-beta-OCIMENE                            | 0.45        |          |               |
| 14   | 14.83    | gamma-TERPINENE                             | 0.02        |          |               |
| 15   | 15.39    | <b>Trans-beta-OCIMENE</b>                   | <b>4.17</b> |          |               |
| 16   | 15.52    | 3-OCTANONE                                  | 0.18        |          |               |
| 17   | 16.27    | HEXYL ACETATE                               | 0.02        |          |               |
| 18   | 17.08    | HEXENYLIC ESTER + OCTANAL                   | 0.03        |          |               |
| 19   | 17.55    | TRIDECANE                                   | 0.02        |          |               |
| 20   | 18.26    | 3-HEXEN-1-OL ACETATE                        | 0.05        |          |               |
| 21   | 19.03    | 2-HEXEN-1-OL ACETATE                        | 0.02        |          |               |
| 22   | 19.24    | 6-METHYL-5-HEPTEN-2-ONE                     | 1.52        |          |               |
| 23   | 19.78    | 1-HEXANOL                                   | 0.02        |          |               |
| 24   | 20.00    | Cis-ROSE EPOXIDE + 5-HEPTENAL.2.6-DIMETHYL- | 0.08        |          |               |
| 25   | 20.68    | Trans-ROSE EPOXIDE                          | 0.03        |          |               |
| 26   | 20.93    | ALLO-OCIMENE                                | 0.02        |          |               |
| 27   | 21.22    | 3-HEXEN-1-OL                                | 0.03        |          |               |
| 28   | 21.71    | 3-OCTANOL                                   | 0.05        |          |               |
| 29   | 21.89    | NONANAL                                     | 0.11        |          |               |
| 30   | 22.17    | GALBANOLENE                                 | 0.04        |          |               |
| 31   | 22.21    | COMPOUND Mw=150                             | 0.02        |          |               |
| 32   | 22.98    | PERILLENE                                   | 0.02        |          |               |
| 33   | 23.10    | PHOTOCITRAL ISOMER                          | 0.08        |          |               |
| 34   | 23.25    | COMPOUND Mw=152                             | 0.02        |          |               |
| 35   | 23.62    | LINALOOL cis-OXIDE                          | 0.02        |          |               |
| 36   | 24.27    | 1-OCTEN-3-OL                                | 0.59        |          |               |
| 37   | 24.93    | alpha-CUBEBENE                              | 0.03        |          |               |
| 38   | 25.36    | NERYL OXIDE                                 | 0.02        |          |               |
| 39   | 25.80    | <b>CITRONELLAL</b>                          | <b>2.48</b> |          |               |
| 40   | 25.98    | ISOGERANIAL                                 | 0.78        |          |               |
| 41   | 26.54    | alpha-COPAENE                               | 1.08        |          |               |
| 42   | 26.70    | DECANAL                                     | 0.05        |          |               |
| 43   | 27.09    | ISONERAL                                    | 0.41        |          |               |
| 44   | 27.48    | alpha-BOURBONENE                            | 0.02        |          |               |
| 45   | 27.70    | beta-BOURBONENE                             | 0.44        |          |               |
| 46   | 28.56    | beta1-CUBEBENE                              | 0.51        |          |               |
| 47   | 28.66    | LINALOOL                                    | 1.00        |          | 1.00          |
| 48   | 28.80    | PHOTOCITRAL A                               | 0.43        |          |               |
| 49   | 29.09    | 1-OCTANOL                                   | 0.10        |          |               |
| 50   | 29.50    | METHYL CITRONELLATE                         | 0.46        |          |               |



**Identification results : MELISSA OIL**

| Pics | RT (min) | Compound name             | %            | Norm (%) | Allergens (%) |
|------|----------|---------------------------|--------------|----------|---------------|
| 51   | 29.85    | TERPENIC ALCOHOL          | 0.74         |          |               |
| 52   | 30.14    | epsilon-CADINENE          | 0.37         |          |               |
| 53   | 30.29    | SESQUITERPENE             | 0.12         |          |               |
| 54   | 30.85    | beta-ELEMENE              | 0.63         |          |               |
| 55   | 30.99    | beta-CUBEBENE             | 0.17         |          |               |
| 56   | 31.28    | <b>beta-CARYOPHYLLENE</b> | <b>21.55</b> |          |               |
| 57   | 32.62    | CADINA-3,5-DIENE          | 0.10         |          |               |
| 58   | 32.79    | SESQUITERPENE             | 0.15         |          |               |
| 59   | 32.91    | METHYL NERATE             | 0.07         |          |               |
| 60   | 32.98    | SESQUITERPENE             | 0.14         |          |               |
| 61   | 33.20    | ALLO-AROMADENDRENE        | 0.26         |          |               |
| 62   | 33.49    | CITRONELLYL ACETATE       | 0.10         |          |               |
| 63   | 33.78    | ZONARENE                  | 0.20         |          |               |
| 64   | 33.94    | E-beta-FARNESENE          | 0.62         |          |               |
| 65   | 34.21    | alpha-HUMULENE            | 1.65         |          |               |
| 66   | 34.45    | Cis-4,5-MUROLADIENE       | 0.16         |          |               |
| 67   | 34.65    | <b>NERAL</b>              | <b>13.20</b> |          | 13.20         |
| 68   | 34.77    | TERPENIC ALCOHOL          | 0.10         |          |               |
| 69   | 34.98    | gamma-MUROLENE            | 0.23         |          |               |
| 70   | 35.08    | METHYL GERANATE           | 0.33         |          |               |
| 71   | 35.95    | <b>GERMACRENE D</b>       | <b>14.70</b> |          |               |
| 72   | 36.12    | SESQUITERPENE             | 0.18         |          |               |
| 73   | 36.37    | alpha-MUROLENE            | 1.21         |          |               |
| 74   | 36.43    | SESQUITERPENE             | 0.32         |          |               |
| 75   | 36.73    | <b>GERANIAL</b>           | <b>18.40</b> |          | 18.40         |
| 76   | 36.84    | BICYCLOGERMACRENE         | 0.16         |          |               |
| 77   | 37.27    | alpha-FARNESENE           | 0.55         |          |               |
| 78   | 37.52    | GERANYL ACETATE           | 1.50         |          |               |
| 79   | 37.71    | delta-CADINENE            | 1.63         |          |               |
| 80   | 37.83    | gamma-CADINENE            | 0.34         |          |               |
| 81   | 38.00    | SESQUITERPENE             | 0.02         |          |               |
| 82   | 38.34    | METHYL SALICYLATE         | 0.05         |          |               |
| 83   | 38.74    | CADINA-1,4-DIENE          | 0.04         |          |               |
| 84   | 39.11    | NEROL                     | 0.46         |          |               |
| 85   | 39.43    | Cis-ISOGERANIOL           | 0.04         |          |               |
| 86   | 39.55    | Trans-ISOGERANIOL         | 0.02         |          |               |
| 87   | 40.13    | beta-DAMASCENONE          | 0.02         |          |               |
| 88   | 40.33    | 2-METHYLENEBORNANE        | 0.02         |          |               |
| 89   | 40.88    | GERANIOL                  | 0.56         |          | 0.56          |
| 90   | 42.74    | EPI-CUBEBOL               | 0.06         |          |               |
| 91   | 42.88    | AROMATIC COMPOUND         | 0.03         |          |               |
| 92   | 44.15    | HUMULENE EPOXIDE          | 0.05         |          |               |
| 93   | 44.66    | CUBEBOL                   | 0.05         |          |               |
| 94   | 46.06    | ISOCARYOPHYLLENE EPOXIDE  | 0.13         |          |               |
| 95   | 46.42    | CARYOPHYLLENE EPOXIDE     | 0.70         |          |               |
| 96   | 48.04    | NEROLIDOL                 | 0.03         |          |               |
| 97   | 48.42    | EPOXY-6,7-HUMULENE        | 0.05         |          |               |
| 98   | 48.61    | COMPOUND Mw=222           | 0.55         |          |               |
| 99   | 48.94    | EPI-CUBENOL               | 0.08         |          |               |
| 100  | 49.18    | CUBENOL                   | 0.03         |          |               |

| Identification results : MELISSA OIL |          |                           |               |          |               |
|--------------------------------------|----------|---------------------------|---------------|----------|---------------|
| Pics                                 | RT (min) | Compound name             | %             | Norm (%) | Allergens (%) |
| 101                                  | 51.23    | PENTADECANONE TRIMETHYL   | 0.05          |          |               |
| 102                                  | 52.66    | T-CADINOL                 | 0.16          |          |               |
| 103                                  | 53.20    | alpha-MUUROLOL            | 0.20          |          |               |
| 104                                  | 53.56    | delta-CADINOL             | 0.05          |          |               |
| 105                                  | 53.79    | CARVACROL                 | 0.07          |          |               |
| 106                                  | 54.08    | GERANYL-alpha-TERPINENE   | 0.07          |          |               |
| 107                                  | 54.67    | alpha-CADINOL             | 0.36          |          |               |
| 108                                  | 54.91    | CITRONELLIC ACID          | 0.04          |          |               |
| 109                                  | 56.76    | CARYOPHYLLA-3,7-DIEN-6-OL | 0.03          |          |               |
| 110                                  | 57.76    | GERANIC ACID              | 0.05          |          |               |
| 111                                  | 58.77    | SESQUITERPENIC EPOXYDE    | 0.02          |          |               |
| 112                                  | 59.17    | SESQUITERPENIC EPOXYDE    | 0.02          |          |               |
| 113                                  | 67.59    | AROMATIC COMPOUND         | 0.05          |          |               |
|                                      |          | <b>TOTAL</b>              | <b>100.00</b> |          | <b>33.23</b>  |

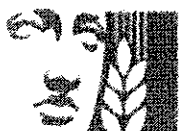

HELLENIC AGRICULTURAL ORGANIZATION - DEMETER

DIRECTORATE GENERAL OF AGRICULTURAL RESEARCH

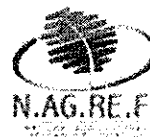

N.A.G.R.E.F.

INSTITUTE OF PLANT BREEDING AND GENETIC RESOURCES  
DEPARTMENT OF AROMATIC AND MEDICINAL PLANTS  
P.O.Box 60458, GR 57001, THERMI, THESSALONIKI, GREECE  
TEL.: +30 2310 471 110, ext. 0 202  
FAX: +30 2310 473 024  
Email: [chatzopoulou@ipgrb.gr](mailto:chatzopoulou@ipgrb.gr)  
[aromparc.ethiage@gmail.com](mailto:aromparc.ethiage@gmail.com)

Thessaloniki, 14 July 2019

Prot.no: 1698

To THARROS SA – TZIOUMAKIS Bros  
5th km Tirnavos-Larisa  
GR 40100, TIRNAVOS  
GREECE

### CERTIFICATE OF ANALYSIS

|               |   |                              |
|---------------|---|------------------------------|
| Sample number | : | 120/2019                     |
| Sample type   | : | OREGANO ESSENTIAL OIL        |
| Costumer      | : | THARROS SA – TZIOUMAKIS Bros |
| Region        | : | TIRNAVOS – LARISA, GREECE    |

| ESSENTIAL OIL ANALYSIS |         |                        |         |
|------------------------|---------|------------------------|---------|
| COMPOUND               | % YIELD | COMPOUND               | % YIELD |
| $\alpha$ -thujene      | 0,48    | $\alpha$ -terpinolene  | 0,08    |
| $\alpha$ -pinene       | 0,47    | p-cymenene             | 0,06    |
| thuja 2,4-(10) diene   | 0,05    | linalool               | 0,12    |
| camphene               | 0,13    | borneol                | 0,37    |
| $\beta$ -pinene        | 0,09    | terpinen-4-ol          | 0,55    |
| 1-octen-3-ol           | 0,22    | carvacrol methyl ether | 0,40    |
| $\beta$ -myrcene       | 0,78    | thymol                 | 4,79    |
| $\alpha$ -phellandrene | 0,12    | carvacrol              | 76,60   |
| $\delta$ -3-carene     | 0,04    | $\beta$ -caryophyllene | 1,42    |
| $\alpha$ -terpinene    | 0,78    | $\alpha$ -humulene     | 0,14    |
| p-cymene               | 7,42    | $\beta$ -bisabolene    | 1,08    |
| limonene               | 0,17    | $\gamma$ -cadinene     | 0,05    |
| $\beta$ -phellandrene  | 0,13    | $\delta$ -cadinene     | 0,07    |
| $\gamma$ -terpinene    | 3,05    | caryophyllene oxide    | 0,18    |
| cis-sabinene hydrate   | 0,13    |                        |         |

The Deputy Director  
Dr P. Chatzopoulou  
Senior Researcher

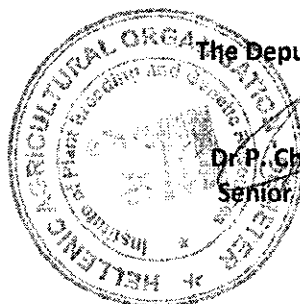

The Chemist

Eleni Lalidou



Supplement: s1 [file s1]
