# Supplementary material for: Comparative Studies on the Anti-Inflammatory and Apoptotic Activities of Four Greek Essential Oils: Involvement in the Regulation of NF-κΒ and Steroid Receptor Signaling
Source: MDPI journal article supplement (doi:10.3390/life13071534), 2023-07-10
Supplement: s1 [file s1]

## Supplementary Materials

# Comparative Studies on the Anti-Inflammatory and Apoptotic Activities of Four Greek Essential Oils: Involvement in the Regulation of NF- $\kappa$ B and Steroid Receptor Signaling

Achilleas Georgantopoulos <sup>1</sup>, Athanasios Vougioukas <sup>1</sup>, Foteini D. Kalousi <sup>1</sup>,  
Ioannis Tsialtas <sup>1</sup>, Anna-Maria G. Psarra <sup>1,\*</sup>

<sup>1</sup> Department of Biochemistry and Biotechnology, University of Thessaly, Biopolis, 41500 Larissa, Greece;  
ageorgant@uth.gr (A.G.); atvougioukas@uth.gr (A.V.); fokalous@uth.gr (F.D.K.); tsialtasj@gmail.com (I.T.);  
ampsarra@uth.gr (A.-M.G.P)

\* Correspondence: ampsarra@uth.gr; Tel.: +30-2410-565221

**Supplementary Data S1.** Chemical composition of the essential oils from Chios Mastic, *Melissa officinalis*, Oregano, and Lavender

## Supplementary Figure S1. Effect of essential oils on ERs transcriptional activation

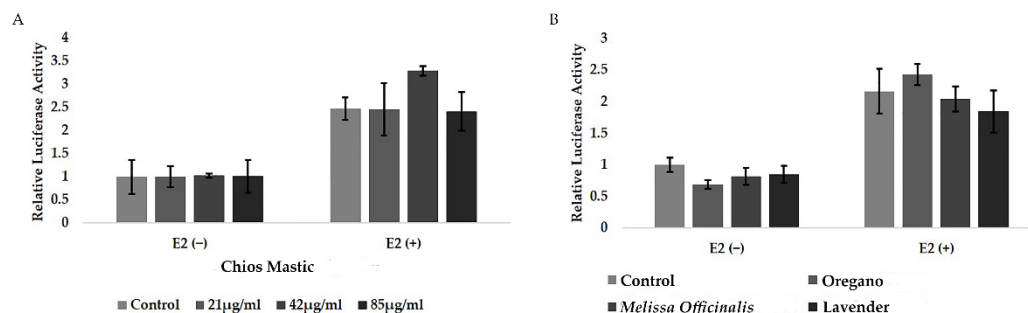

**Figure S1.** A. Chios Mastic essential oil caused no effect on the ER $\beta$  transcriptional activation. Oregano, *Melissa officinalis* and Lavender showed no effect on the ER $\alpha$  transcriptional activation. Cells grown in hormone-free medium for 48 h were transiently co-transfected with a ERE dependent Luciferase reporter gene construct, a PEGFPC2ER $\beta$  (A) or PEGFPC2ER $\alpha$  (B) and a  $\beta$ -galactosidase reporter construct. Subsequently, cells were treated with the indicated amounts of the essential oils, in the presence or absence of E2, for 6 h. Then, cells were harvested and lysed. Assessment of the luciferase and  $\beta$ -galactosidase activity was followed in cells extracts. Relative luciferase activity was expressed as normalized against the  $\beta$ -galactosidase activity. Relative luciferase activity in control cells was set as 1. Data were analyzed by two-way ANOVA and are expressed as mean  $\pm$  SD, (n = 6).

## Supplementary Figure S2. Cytotoxic effects of essential oils on HEK293 cells, upon 24h incubation.

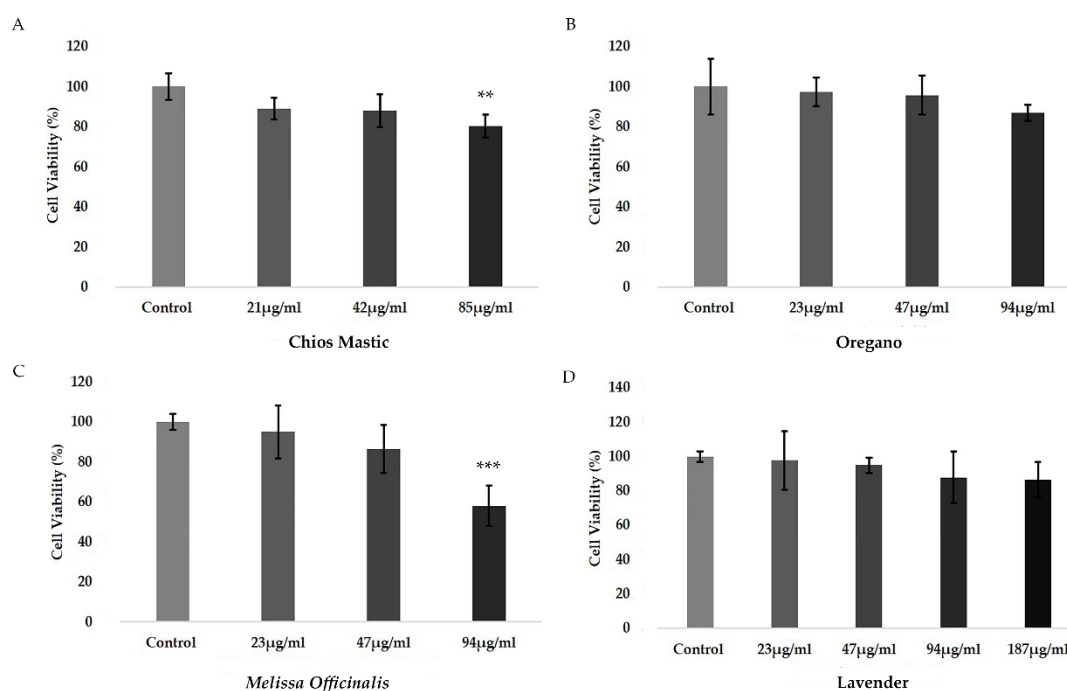

**Figure S2.** Evaluation of the cytotoxic effects of the essential oils from Chios Mastic, Oregano, *Melissa officinalis* and Lavender on HEK-293 cells. Cytotoxicity was assessed by applying MTT assay in HEK-293 cells subjected to treatment with essential oils for 24h. Viability of control cells was considered as 100%. Relative cell viability (Cell viability, %) is expressed as the viability of cells treated with various

concentrations of the respective essential oil, compared to the viability of the control cells. Data are expressed as mean  $\pm$  SD (n=5), \*\* p<0.01, \*\*\* p<0.001.

**Supplementary Figure S3.** Assessment of the anti-inflammatory action of Lavender

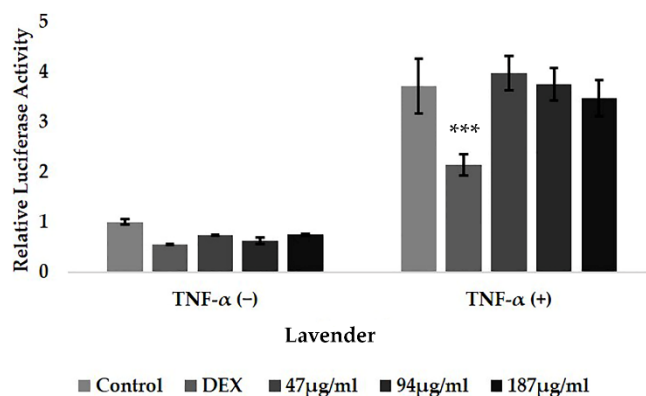

**Figure S3.** No anti-inflammatory activity was observed by the Lavender essential oil at a concentration range of 47 to 187  $\mu$ g/ml. HEK-293 cells were co-transfected with the NF- $\kappa$ B reporter luciferase and the  $\beta$ -galactosidase reporter constructs and subsequently were treated with the indicated concentrations of the Lavender essential oil, or with 1  $\mu$ M DEX, for 6h, in the presence or absence of 20ng/ml TNF- $\alpha$ , at hormone-free medium. Assessment of the luciferase and the  $\beta$ -galactosidase activity was followed. Results were expressed as relative luciferase activity normalized against  $\beta$ -galactosidase activity. Relative luciferase activity in control vehicle-treated cells was set as 1. Data are expressed as mean  $\pm$  SD, (n=6), \*\*\* p<0.001.
