# Supplementary material for: Comparative Studies on the Anti-Inflammatory and Apoptotic Activities of Four Greek Essential Oils: Involvement in the Regulation of NF-κΒ and Steroid Receptor Signaling
Source: MDPI journal article supplement (doi:10.3390/life13071534), 2023-07-10
Supplement: s1 [file s1]

# Comparative Studies on the Anti-Inflammatory and Apoptotic Activities of Four Greek Essential Oils: Involvement in the Regulation of NF- $\kappa$ B and Steroid Receptor Signaling

**Figure S4:** Representative images used in western blot analysis

**Figure 4A. GR-PEPCK films**

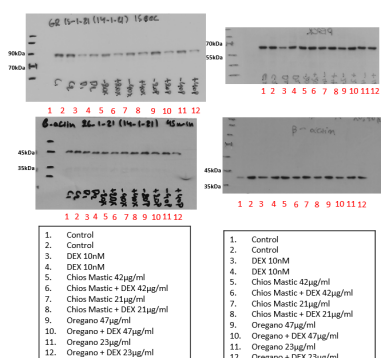

**Figure 6A. p65 films**

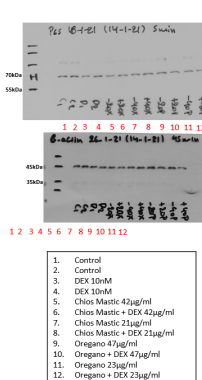

**Figure 7A. procasp-3 films**

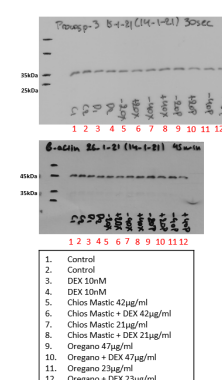

| Figure 4A-6A & 7A<br>Procasp-3, GR, p65 | Densitometry readings |       |      |                |
|-----------------------------------------|-----------------------|-------|------|----------------|
|                                         | Procasp-3             | GR    | p65  | $\beta$ -actin |
| Control                                 | 9304                  | 12758 | 8594 | 7800           |
| Control                                 | 9997                  | 13737 | 9778 | 8801           |
| DEX 10nM                                | 6670                  | 3015  | 6343 | 7421           |
| DEX 10nM                                | 7844                  | 6497  | 8150 | 8756           |
| Chios Mastic 42 $\mu$ g/ml              | 7204                  | 8759  | 5466 | 7655           |
| Chios Mastic + DEX 42 $\mu$ g/ml        | 7301                  | 4359  | 5640 | 6045           |
| Chios Mastic 21 $\mu$ g/ml              | 9041                  | 9276  | 6176 | 7555           |
| Chios Mastic + DEX 21 $\mu$ g/ml        | 10674                 | 7734  | 9337 | 8976           |
| Oregano 47 $\mu$ g/ml                   | 10809                 | 13261 | 9869 | 12094          |
| Oregano + DEX 47 $\mu$ g/ml             | 7245                  | 5197  | 5459 | 9055           |
| Oregano 23 $\mu$ g/ml                   | 8940                  | 13698 | 6264 | 8807           |
| Oregano + DEX 23 $\mu$ g/ml             | 7457                  | 3993  | 6803 | 5900           |

| Figure 4A-6A & 7A<br>Procasp-3, GR, p65 | Relative protein levels (protein densitometry readings/ $\beta$ -actin densitometry readings) |          |          |
|-----------------------------------------|-----------------------------------------------------------------------------------------------|----------|----------|
|                                         | Procasp-3                                                                                     | GR       | p65      |
| Control                                 | 1.192821                                                                                      | 1.635641 | 1.101795 |
| Control                                 | 1.135894                                                                                      | 1.560845 | 1.11101  |
| DEX 10nM                                | 0.898801                                                                                      | 0.406279 | 0.854737 |
| DEX 10nM                                | 0.895843                                                                                      | 0.742005 | 0.93079  |
| Chios Mastic 42 $\mu$ g/ml              | 0.941084                                                                                      | 1.144219 | 0.714043 |

|                            |          |          |          |
|----------------------------|----------|----------|----------|
|                            |          |          |          |
| Chios Mastic + DEX 42µg/ml | 1.207775 | 0.721092 | 0.933002 |
| Chios Mastic 21µg/ml       | 1.196691 | 1.227796 | 0.817472 |
| Chios Mastic + DEX 21µg/ml | 1.189171 | 0.861631 | 1.040218 |
| Oregano 47µg/ml            | 0.893749 | 1.096494 | 0.816024 |
| Oregano + DEX 47µg/ml      | 0.80011  | 0.573937 | 0.602871 |
| Oregano 23µg/ml            | 1.015102 | 1.555354 | 0.711252 |
| Oregano + DEX 23µg/ml      | 1.263898 | 0.67678  | 1.153051 |

| Figure 4A-6A & 7A<br>Procasp-3,GR,p65 | Ratio (Relative sample protein levels/Relative control protein levels) |     |     |
|---------------------------------------|------------------------------------------------------------------------|-----|-----|
|                                       | Procasp-3                                                              | GR  | p65 |
| Control                               | 1                                                                      | 1   | 1   |
| Control                               | 1                                                                      | 1   | 1   |
| DEX 10nM                              | 0.8                                                                    | 0.2 | 0.8 |
| DEX 10nM                              | 0.8                                                                    | 0.5 | 0.8 |
| Chios Mastic 42µg/ml                  | 0.8                                                                    | 0.7 | 0.6 |
| Chios Mastic + DEX 42µg/ml            | 1                                                                      | 0.4 | 0.8 |
| Chios Mastic 21µg/ml                  | 1                                                                      | 0.8 | 0.7 |
| Chios Mastic + DEX 21µg/ml            | 1                                                                      | 0.5 | 0.9 |
| Oregano 47µg/ml                       | 0.7                                                                    | 0.7 | 0.7 |
| Oregano + DEX 47µg/ml                 | 0.7                                                                    | 0.4 | 0.5 |
| Oregano 23µg/ml                       | 0.9                                                                    | 1   | 0.6 |
| Oregano + DEX 23µg/ml                 | 1                                                                      | 0.4 | 1   |

| PEPCK                      | Densitometry readings |         |
|----------------------------|-----------------------|---------|
|                            | PEPCK                 | β-actin |
| Control                    | 8409                  | 1965    |
| Control                    | 9875                  | 12202   |
| DEX 10nM                   | 5526                  | 7182    |
| DEX 10nM                   | 7918                  | 10030   |
| Chios Mastic 42µg/ml       | 8162                  | 10554   |
| Chios Mastic + DEX 42µg/ml | 8347                  | 8305    |
| Chios Mastic 21µg/ml       | 8182                  | 8801    |
| Chios Mastic + DEX 21µg/ml | 6996                  | 6474    |
| Oregano 47µg/ml            | 9515                  | 10210   |
| Oregano + DEX 47µg/ml      | 7981                  | 9398    |
| Oregano 23µg/ml            | 8896                  | 9498    |
| Oregano + DEX 23µg/ml      | 9563                  | 6791    |

| PEPCK Figure 4A | Relative protein levels<br>(protein densitometry<br>readings/β-actin<br>densitometry readings) |
|-----------------|------------------------------------------------------------------------------------------------|
|                 | PEPCK                                                                                          |

|                            |          |
|----------------------------|----------|
| Control                    | 0.809294 |
| DEX 10nM                   | 0.769424 |
| DEX 10nM                   | 0.789432 |
| Chios Mastic 42µg/ml       | 0.773356 |
| Chios Mastic + DEX 42µg/ml | 1.005057 |
| Chios Mastic 21µg/ml       | 0.929667 |
| Chios Mastic + DEX 21µg/ml | 1.08063  |
| Oregano 47µg/ml            | 0.931929 |
| Oregano + DEX 47µg/ml      | 0.849223 |
| Oregano 23µg/ml            | 0.936618 |
| Oregano + DEX 23µg/ml      | 1.408187 |

| PEPCK Figure 4A            | Ratio (Relative sample protein levels/Relative control protein levels) |
|----------------------------|------------------------------------------------------------------------|
|                            | PEPCK                                                                  |
| Control                    | 1                                                                      |
| DEX 10nM                   | 1                                                                      |
| DEX 10nM                   | 1                                                                      |
| Chios Mastic 42µg/ml       | 1                                                                      |
| Chios Mastic + DEX 42µg/ml | 1.2                                                                    |
| Chios Mastic 21µg/ml       | 1                                                                      |
| Chios Mastic + DEX 21µg/ml | 1.3                                                                    |
| Oregano 47µg/ml            | 1.2                                                                    |
| Oregano + DEX 47µg/ml      | 1                                                                      |
| Oregano 23µg/ml            | 1.2                                                                    |
| Oregano + DEX 23µg/ml      | 1.7                                                                    |

Figure 4B. GR-PEPCK films

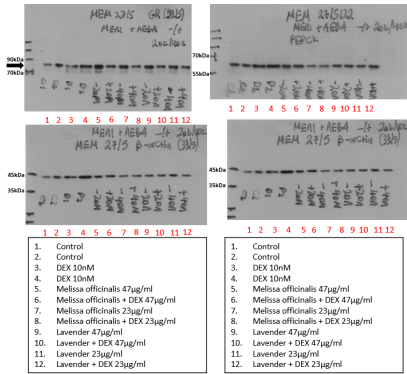

Figure 6B. p65 films

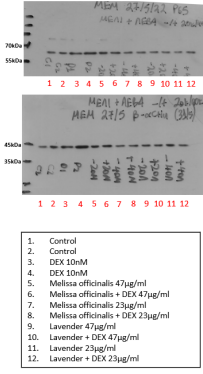

Figure 7B. Procasp-9 & Procasp-3 films

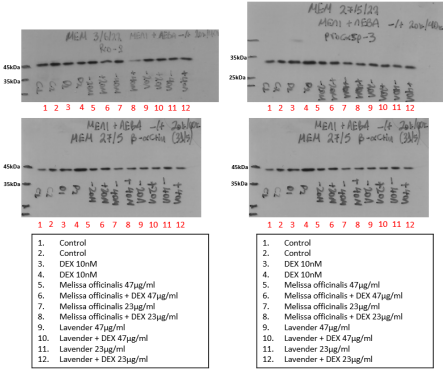

| Figure 4B-6B & 7B<br>GR, PEPCK, Procasp-3, Procasp-9, p65 | Densitometry readings |       |           |           |      |         |
|-----------------------------------------------------------|-----------------------|-------|-----------|-----------|------|---------|
|                                                           | GR                    | PEPCK | Procasp-3 | Procasp-9 | p65  | b-actin |
| Control                                                   | 8517                  | 7724  | 6302      | 10244     | 7276 | 6417    |
| Control                                                   | 9835                  | 8680  | 7136      | 11523     | 8177 | 7584    |

|                                   |       |       |       |       |       |       |
|-----------------------------------|-------|-------|-------|-------|-------|-------|
| DEX 10nM                          | 7754  | 14809 | 8841  | 12748 | 11433 | 10641 |
| DEX 10nM                          | 10378 | 13787 | 10049 | 14438 | 12102 | 12050 |
| Melissa Officinalis 47µg/ml       | 8318  | 7540  | 6153  | 10950 | 13683 | 9647  |
| Melissa Officinalis + DEX 47µg/ml | 5541  | 14753 | 7189  | 7087  | 8328  | 9799  |
| Melissa Officinalis 23µg/ml       | 7112  | 6804  | 4489  | 8581  | 10942 | 8389  |
| Melissa Officinalis + DEX 23µg/ml | 4118  | 5937  | 4678  | 4149  | 7134  | 7411  |
| Lavender 47µg/ml                  | 7471  | 6178  | 6014  | 8616  | 5527  | 7501  |
| Lavender + DEX 47µg/ml            | 5157  | 8457  | 6289  | 9282  | 5889  | 6107  |
| Lavender 23µg/ml                  | 7392  | 7414  | 5966  | 8944  | 5127  | 5894  |
| Lavender + DEX 23µg/ml            | 5598  | 8512  | 5781  | 7686  | 6684  | 5619  |

| Figure 4B-6B & 7B<br>GR, PEPCK, Procasp-3, Procasp-9, p65 | Relative protein levels (protein densitometry readings/ $\beta$ -actin densitometry readings) |          |           |           |          |
|-----------------------------------------------------------|-----------------------------------------------------------------------------------------------|----------|-----------|-----------|----------|
|                                                           | GR                                                                                            | PEPCK    | Procasp-3 | Procasp-9 | P65      |
| Control                                                   | 1.327256                                                                                      | 1.203678 | 0.982079  | 1.596385  | 1.133863 |
| Control                                                   | 1.296809                                                                                      | 1.144515 | 0.940928  | 1.519383  | 1.078191 |
| DEX 10nM                                                  | 0.728691                                                                                      | 1.391693 | 0.830843  | 1.198008  | 1.074429 |
| DEX 10nM                                                  | 0.861245                                                                                      | 1.144149 | 0.833942  | 1.198174  | 1.004315 |
| Melissa Officinalis 47µg/ml                               | 0.862237                                                                                      | 0.78159  | 0.637815  | 1.135068  | 1.418368 |
| Melissa Officinalis + DEX 47µg/ml                         | 0.565466                                                                                      | 1.505562 | 0.733646  | 0.723237  | 0.849883 |
| Melissa Officinalis 23µg/ml                               | 0.847777                                                                                      | 0.811062 | 0.535105  | 1.022887  | 1.304327 |
| Melissa Officinalis + DEX 23µg/ml                         | 0.555661                                                                                      | 0.801106 | 0.631224  | 0.559843  | 0.962623 |
| Lavender 47µg/ml                                          | 0.996001                                                                                      | 0.823624 | 0.80176   | 1.148647  | 0.736835 |
| Lavender + DEX 47µg/ml                                    | 0.844441                                                                                      | 1.384804 | 1.029802  | 1.519895  | 0.964303 |
| Lavender 23µg/ml                                          | 1.254157                                                                                      | 1.257889 | 1.012216  | 1.517475  | 0.869868 |
| Lavender + DEX 23µg/ml                                    | 0.996263                                                                                      | 1.51486  | 1.028831  | 1.367859  | 1.189536 |

| Figure 4B-6B & 7B<br>GR, PEPCK, Procasp-3, Procasp-9, p65 | Ratio (Relative sample protein levels/Relative control protein levels) |       |           |           |     |
|-----------------------------------------------------------|------------------------------------------------------------------------|-------|-----------|-----------|-----|
|                                                           | GR                                                                     | PEPCK | Procasp-3 | Procasp-9 | P65 |
| Control                                                   | 1                                                                      | 1     | 1         | 1         | 1   |
| Control                                                   | 1                                                                      | 1     | 1         | 1         | 1   |
| DEX 10nM                                                  | 0.5                                                                    | 1.2   | 0.8       | 0.8       | 0.9 |
| DEX 10nM                                                  | 0.6                                                                    | 1     | 0.8       | 0.8       | 0.9 |
| Melissa Officinalis 47µg/ml                               | 0.6                                                                    | 0.6   | 0.6       | 0.7       | 1.3 |
| Melissa Officinalis + DEX 47µg/ml                         | 0.4                                                                    | 1.3   | 0.7       | 0.5       | 0.7 |
| Melissa Officinalis 23µg/ml                               | 0.6                                                                    | 0.7   | 0.5       | 0.6       | 1.2 |
| Melissa Officinalis + DEX 23µg/ml                         | 0.4                                                                    | 0.7   | 0.6       | 0.4       | 0.8 |
| Lavender 47µg/ml                                          | 0.8                                                                    | 0.7   | 0.8       | 0.7       | 0.6 |
| Lavender + DEX 47µg/ml                                    | 0.6                                                                    | 1.2   | 1         | 1         | 0.9 |
| Lavender 23µg/ml                                          | 0.9                                                                    | 1     | 1         | 1         | 0.8 |
| Lavender + DEX 23µg/ml                                    | 0.8                                                                    | 1.3   | 1         | 0.9       | 1   |
